# Supplementary material for: Arbuscular mycorrhizal fungi improve the growth and performance in the seedlings of Leymus chinensis under alkali and drought stresses
Source: PeerJ. 2022 Feb 3;10:e12890. doi: 10.7717/peerj.12890 (PMC8818268; doi:10.7717/peerj.12890)
Supplement: Data S1 — Infection rate, dry weight, water content, proline, MDA and potassium-sodium ions content. [file peerj-10-12890-s001.xlsx]

## Sheet: infection rate
CK1	96			Descriptives									VAR00002
CK2	96			VAR00002										VAR00001	N	Subset for alpha = .05
CK3	100				N	Mean	Std. Deviation	Std. Error	95% Confidence Interval for Mean		Minimum	Maximum				1	2	3	4	5	6	7
A1-1	82								Lower Bound	Upper Bound			Duncan(a)	9	3	46.6667
A1-2	80			1	3	97.3333	2.3094	1.33333	91.5965	103.07	96	100		6	3		52.6667
A1-3	76			2	3	79.3333	3.05505	1.76383	71.7442	86.9225	76	82		3	3			63.3333
A2-1	65			3	3	63.3333	2.88675	1.66667	56.1622	70.5044	60	65		8	3			67.3333
A2-2	65			4	3	96.6667	1.1547	0.66667	93.7982	99.5351	96	98		5	3				74
A2-3	60			5	3	74	3.4641	2	65.3947	82.6053	70	76		2	3					79.3333
D1-1	98			6	3	52.6667	4.6188	2.66667	41.1929	64.1404	50	58		7	3						90.6667
D1-2	96			7	3	90.6667	1.1547	0.66667	87.7982	93.5351	90	92		4	3							96.6667
D1-3	96			8	3	67.3333	3.05505	1.76383	59.7442	74.9225	64	70		1	3							97.3333
A1D1-1	76			9	3	46.6667	1.1547	0.66667	43.7982	49.5351	46	48		Sig.		1	1	0.095	1	1	1	0.773
A1D1-2	76			Total	27	74.2222	17.8807	3.44113	67.1489	81.2956	46	100	Means for groups in homogeneous subsets are displayed.
A1D1-3	70												a	Uses Harmonic Mean Sample Size = 3.000.
A2D1-1	50
A2D1-2	58
A2D1-3	50
D2-1	92
D2-2	90
D2-3	90
A1D2-1	68
A1D2-2	70
A1D2-3	64
A2D2-1	46
A2D2-2	46
A2D2-3	48
1	1	96		Tests of Between-Subjects Effects
1	1	96		Dependent Variable: VAR00003
1	1	100		Source	Type III Sum of Squares	df	Mean Square	F	Sig.
2	1	82		Corrected Model	8173.333(a)	8	1021.67	131.986	0
2	1	80		Intercept	148741	1	148741	19215.4	0
2	1	76		VAR00001	7448	2	3724	481.091	0
3	1	65		VAR00002	624.889	2	312.444	40.364	0
3	1	65		VAR00001 * VAR00002	100.444	4	25.111	3.244	0.036
3	1	60		Error	139.333	18	7.741
1	1	98		Total	157054	27
1	1	96		Corrected Total	8312.67	26
1	1	96		a	R Squared = .983 (Adjusted R Squared = .976)
2	1	76
2	1	76
2	1	70
3	1	50
3	1	58
3	1	50
1	1	92
1	1	90
1	1	90
2	1	68
2	1	70
2	1	64
3	1	46
3	1	46
3	1	48

## Sheet: dry weight
-AMF			+AMF				-AMF
CK1	0.402857		CK1	0.463333			Descriptives									VAR00002
CK2	0.298889		CK2	0.45			VAR00002										VAR00001	N	Subset for alpha = .05
CK3	0.333		CK3	0.55				N	Mean	Std. Deviation	Std. Error	95% Confidence Interval for Mean		Minimum	Maximum				1	2	3	4	5
A1-1	0.231429		A1-1	0.263333								Lower Bound	Upper Bound			Duncan(a)	9	3	0.1533
A1-2	0.2525		A1-2	0.287143			1	3	0.3433	0.05132	0.02963	0.2159	0.4708	0.3	0.4		6	3	0.1833	0.1833
A1-3	0.261667		A1-3	0.21			2	3	0.2467	0.01528	0.00882	0.2087	0.2846	0.23	0.26		8	3	0.1833	0.1833
A2-1	0.175		A2-1	0.266667			3	3	0.1967	0.02887	0.01667	0.125	0.2684	0.18	0.23		3	3		0.1967	0.1967
A2-2	0.228		A2-2	0.185714			4	3	0.2333	0.00577	0.00333	0.219	0.2477	0.23	0.24		5	3		0.2067	0.2067	0.2067
A2-3	0.178		A2-3	0.198571			5	3	0.2067	0.00577	0.00333	0.1923	0.221	0.2	0.21		7	3		0.2067	0.2067	0.2067
D1-1	0.23		D1-1	0.45			6	3	0.1833	0.00577	0.00333	0.169	0.1977	0.18	0.19		4	3			0.2333	0.2333
D1-2	0.24		D1-2	0.48			7	3	0.2067	0.02082	0.01202	0.155	0.2584	0.19	0.23		2	3				0.2467
D1-3	0.23		D1-3	0.5			8	3	0.1833	0.01528	0.00882	0.1454	0.2213	0.17	0.2		1	3					0.3433
A1D1-1	0.2		A1D1-1	0.23			9	3	0.1533	0.00577	0.00333	0.139	0.1677	0.15	0.16		Sig.		0.136	0.264	0.08	0.058	1
A1D1-2	0.21		A1D1-2	0.23			Total	27	0.217	0.05587	0.01075	0.1949	0.2391	0.15	0.4	Means for groups in homogeneous subsets are displayed.
A1D1-3	0.21		A1D1-3	0.25												a	Uses Harmonic Mean Sample Size = 3.000.
A2D1-1	0.18		A2D1-1	0.18
A2D1-2	0.19		A2D1-2	0.2			+AMF
A2D1-3	0.18		A2D1-3	0.2			Descriptives									VAR00002
D2-1	0.23		D2-1	0.4			VAR00002										VAR00001	N	Subset for alpha = .05
D2-2	0.2		D2-2	0.41				N	Mean	Std. Deviation	Std. Error	95% Confidence Interval for Mean		Minimum	Maximum				1	2	3	4	5
D2-3	0.19		D2-3	0.41								Lower Bound	Upper Bound			Duncan(a)	9	3	0.1733
A1D2-1	0.2		A1D2-1	0.2			1	3	0.4867	0.05508	0.0318	0.3499	0.6235	0.45	0.55		6	3	0.1933	0.1933
A1D2-2	0.18		A1D2-2	0.19			2	3	0.2533	0.04041	0.02333	0.1529	0.3537	0.21	0.29		8	3	0.1933	0.1933
A1D2-3	0.17		A1D2-3	0.19			3	3	0.22	0.04359	0.02517	0.1117	0.3283	0.19	0.27		3	3	0.22	0.22	0.22
A2D2-1	0.16		A2D2-1	0.17			4	3	0.4767	0.02517	0.01453	0.4142	0.5392	0.45	0.5		5	3		0.2367	0.2367
A2D2-2	0.15		A2D2-2	0.17			5	3	0.2367	0.01155	0.00667	0.208	0.2654	0.23	0.25		2	3			0.2533
A2D2-3	0.15		A2D2-3	0.18			6	3	0.1933	0.01155	0.00667	0.1646	0.222	0.18	0.2		7	3				0.4067
							7	3	0.4067	0.00577	0.00333	0.3923	0.421	0.4	0.41		4	3					0.4767
							8	3	0.1933	0.00577	0.00333	0.179	0.2077	0.19	0.2		1	3					0.4867
							9	3	0.1733	0.00577	0.00333	0.159	0.1877	0.17	0.18		Sig.		0.085	0.109	0.199	1	0.678
							Total	27	0.2933	0.1241	0.02388	0.2442	0.3424	0.17	0.55	Means for groups in homogeneous subsets are displayed.
																a	Uses Harmonic Mean Sample Size = 3.000.
IN	AC	DC
1	1	1	0.402857		Tests of Between-Subjects Effects
1	1	1	0.298889		Dependent Variable: VAR00004
1	1	1	0.333		Source	Type III Sum of Squares	df	Mean Square	F	Sig.
1	2	1	0.231429		Corrected Model	.536(a)	17	0.032	47.034	0
1	2	1	0.2525		Intercept	3.516	1	3.516	5245.54	0
1	2	1	0.261667		VAR00001	0.079	1	0.079	117.227	0		117.227	224.033	34.478	71.613	2.257	2.481	1.917
1	3	1	0.175		VAR00002	0.3	2	0.15	224.033	0
1	3	1	0.228		VAR00003	0.046	2	0.023	34.478	0
1	3	1	0.178		VAR00001 * VAR00002	0.096	2	0.048	71.613	0
1	1	2	0.23		VAR00001 * VAR00003	0.003	2	0.002	2.257	0.119
1	1	2	0.24		VAR00002 * VAR00003	0.007	4	0.002	2.481	0.061
1	1	2	0.23		VAR00001 * VAR00002 * VAR00003	0.005	4	0.001	1.917	0.129
1	2	2	0.2		Error	0.024	36	0.001
1	2	2	0.21		Total	4.077	54
1	2	2	0.21		Corrected Total	0.56	53
1	3	2	0.18		a	R Squared = .957 (Adjusted R Squared = .937)
1	3	2	0.19
1	3	2	0.18
1	1	3	0.23
1	1	3	0.2
1	1	3	0.19
1	2	3	0.2
1	2	3	0.18
1	2	3	0.17
1	3	3	0.16
1	3	3	0.15
1	3	3	0.15
2	1	1	0.463333
2	1	1	0.45
2	1	1	0.55
2	2	1	0.263333
2	2	1	0.287143
2	2	1	0.21
2	3	1	0.266667
2	3	1	0.185714
2	3	1	0.198571
2	1	2	0.45
2	1	2	0.48
2	1	2	0.5
2	2	2	0.23
2	2	2	0.23
2	2	2	0.25
2	3	2	0.18
2	3	2	0.2
2	3	2	0.2
2	1	3	0.4
2	1	3	0.41
2	1	3	0.41
2	2	3	0.2
2	2	3	0.19
2	2	3	0.19
2	3	3	0.17
2	3	3	0.17
2	3	3	0.18

## Sheet: water content
-AMF				+AMF			-AMF
CK1	0.839886			CK1	0.840743		Descriptives									VAR00002
CK2	0.856061			CK2	0.842683		VAR00002										VAR00001	N	Subset for alpha = .05
CK3	0.852304			CK3	0.862536			N	Mean	Std. Deviation	Std. Error	95% Confidence Interval for Mean		Minimum	Maximum				1	2	3	4	5	6	7
A1-1	0.768924			A1-1	0.851064							Lower Bound	Upper Bound			Duncan(a)	9	3	0.64
A1-2	0.819361			A1-2	0.802165		1	3	0.8494	0.00847	0.00489	0.8284	0.8704	0.84	0.86		6	3		0.6767
A1-3	0.800735			A1-3	0.807339		2	3	0.7963	0.0255	0.01472	0.733	0.8597	0.77	0.82		3	3			0.7067
A2-1	0.7			A2-1	0.775281		3	3	0.7067	0.00577	0.00333	0.6923	0.721	0.7	0.71		8	3			0.7267	0.7267
A2-2	0.71			A2-2	0.791332		4	3	0.8233	0.00577	0.00333	0.809	0.8377	0.82	0.83		5	3				0.7433
A2-3	0.71			A2-3	0.793155		5	3	0.7433	0.00577	0.00333	0.729	0.7577	0.74	0.75		2	3					0.7963
D1-1	0.83			D1-1	0.84		6	3	0.6767	0.00577	0.00333	0.6623	0.691	0.67	0.68		7	3					0.8033	0.8033
D1-2	0.82			D1-2	0.82		7	3	0.8033	0.01528	0.00882	0.7654	0.8413	0.79	0.82		4	3						0.8233
D1-3	0.82			D1-3	0.82		8	3	0.7267	0.01155	0.00667	0.698	0.7554	0.72	0.74		1	3							0.8494
A1D1-1	0.75			A1D1-1	0.77		9	3	0.64	0.01732	0.01	0.597	0.683	0.62	0.65		Sig.		1	1	0.076	0.134	0.518	0.076	1
A1D1-2	0.74			A1D1-2	0.78		Total	27	0.7518	0.06894	0.01327	0.7245	0.779	0.62	0.86	Means for groups in homogeneous subsets are displayed.
A1D1-3	0.74			A1D1-3	0.77											a	Uses Harmonic Mean Sample Size = 3.000.
A2D1-1	0.68			A2D1-1	0.7
A2D1-2	0.67			A2D1-2	0.71		+AMF
A2D1-3	0.68			A2D1-3	0.71		Descriptives									VAR00002
D2-1	0.82			D2-1	0.8		VAR00002										VAR00001	N	Subset for alpha = .05
D2-2	0.8			D2-2	0.8			N	Mean	Std. Deviation	Std. Error	95% Confidence Interval for Mean		Minimum	Maximum				1	2	3	4	5	6
D2-3	0.79			D2-3	0.79							Lower Bound	Upper Bound			Duncan(a)	9	3	0.6933
A1D2-1	0.74			A1D2-1	0.75		1	3	0.8467	0.01155	0.00667	0.818	0.8754	0.84	0.86		6	3	0.7067
A1D2-2	0.72			A1D2-2	0.72		2	3	0.82	0.02646	0.01528	0.7543	0.8857	0.8	0.85		8	3		0.7367
A1D2-3	0.72			A1D2-3	0.74		3	3	0.7867	0.00577	0.00333	0.7723	0.801	0.78	0.79		5	3			0.7733
A2D2-1	0.65			A2D2-1	0.68		4	3	0.8267	0.01155	0.00667	0.798	0.8554	0.82	0.84		3	3			0.7867	0.7867
A2D2-2	0.65			A2D2-2	0.7		5	3	0.7733	0.00577	0.00333	0.759	0.7877	0.77	0.78		7	3				0.7967
A2D2-3	0.62			A2D2-3	0.7		6	3	0.7067	0.00577	0.00333	0.6923	0.721	0.7	0.71		2	3					0.82
							7	3	0.7967	0.00577	0.00333	0.7823	0.811	0.79	0.8		4	3					0.8267	0.8267
							8	3	0.7367	0.01528	0.00882	0.6987	0.7746	0.72	0.75		1	3						0.8467
							9	3	0.6933	0.01155	0.00667	0.6646	0.722	0.68	0.7		Sig.		0.217	1	0.217	0.35	0.53	0.071
							Total	27	0.7763	0.05285	0.01017	0.7554	0.7972	0.68	0.86	Means for groups in homogeneous subsets are displayed.
																a	Uses Harmonic Mean Sample Size = 3.000.
IN	AC	DC
1	1	1	0.839886			Tests of Between-Subjects Effects
1	1	1	0.856061			Dependent Variable: VAR00004
1	1	1	0.852304			Source	Type III Sum of Squares	df	Mean Square	F	Sig.
1	2	1	0.768924			Corrected Model	.198(a)	17	0.012	70.265	0
1	2	1	0.819361			Intercept	31.522	1	31.522	189839	0
1	2	1	0.800735			VAR00001	0.008	1	0.008	48.984	0
1	3	1	0.7			VAR00002	0.136	2	0.068	408.225	0
1	3	1	0.71			VAR00003	0.043	2	0.021	128.62	0
1	3	1	0.71			VAR00001 * VAR00002	0.007	2	0.004	21.832	0
1	1	2	0.83			VAR00001 * VAR00003	0.001	2	0	1.713	0.195
1	1	2	0.82			VAR00002 * VAR00003	0.002	4	0.001	3.629	0.014
1	1	2	0.82			VAR00001 * VAR00002 * VAR00003	0.002	4	0	2.557	0.055
1	2	2	0.75			Error	0.006	36	0
1	2	2	0.74			Total	31.726	54
1	2	2	0.74			Corrected Total	0.204	53
1	3	2	0.68			a	R Squared = .971 (Adjusted R Squared = .957)
1	3	2	0.67
1	3	2	0.68
1	1	3	0.82
1	1	3	0.8
1	1	3	0.79
1	2	3	0.74
1	2	3	0.72
1	2	3	0.72
1	3	3	0.65
1	3	3	0.65
1	3	3	0.62
2	1	1	0.840743
2	1	1	0.842683
2	1	1	0.862536
2	2	1	0.851064
2	2	1	0.802165
2	2	1	0.807339
2	3	1	0.775281
2	3	1	0.791332
2	3	1	0.793155
2	1	2	0.84
2	1	2	0.82
2	1	2	0.82
2	2	2	0.77
2	2	2	0.78
2	2	2	0.77
2	3	2	0.7
2	3	2	0.71
2	3	2	0.71
2	1	3	0.8
2	1	3	0.8
2	1	3	0.79
2	2	3	0.75
2	2	3	0.72
2	2	3	0.74
2	3	3	0.68
2	3	3	0.7
2	3	3	0.7

## Sheet: proline
-AMF				+AMF			-AMF
CK1	7.4484			CK1	7.70714		Descriptives									VAR00002
CK2	7.42212			CK2	6.73404		VAR00002										VAR00001	N	Subset for alpha = .05
CK3	7.4894			CK3	7.84897			N	Mean	Std. Deviation	Std. Error	95% Confidence Interval for Mean		Minimum	Maximum				1	2	3	4	5	6
A1-1	20.3906			A1-1	26.5							Lower Bound	Upper Bound			Duncan(a)	1	3	7.4533
A1-2	20.6315			A1-2	30		1	3	7.4533	0.03391	0.01958	7.3691	7.5375	7.42	7.49		4	3	10.5
A1-3	22.4453			A1-3	28.2		2	3	21.1558	1.12322	0.64849	18.3655	23.946	20.39	22.45		7	3		15.4333
A2-1	25.8488			A2-1	31.5		3	3	30.5728	4.0954	2.36448	20.3992	40.7463	25.85	33.12		2	3			21.1558
A2-2	33.1227			A2-2	34		4	3	10.5	1.5	0.86603	6.7738	14.2262	9	12		5	3			24.4333
A2-3	32.7468			A2-3	35.5		5	3	24.4333	1.60104	0.92436	20.4561	28.4105	22.8	26		8	3				30.2333
D1-1	10.5			D1-1	13		6	3	38.4333	1.72143	0.99387	34.1571	42.7096	36.5	39.8		3	3				30.5728
D1-2	12			D1-2	14.5		7	3	15.4333	3.20364	1.84962	7.475	23.3916	12.8	19		6	3					38.4333
D1-3	9			D1-3	14		8	3	30.2333	1.16762	0.67412	27.3328	33.1339	29.2	31.5		9	3						44.5
A1D1-1	24.5			A1D1-1	27.3		9	3	44.5	4.7697	2.75379	32.6514	56.3486	40	49.5		Sig.		0.166	1	0.138	0.874	1	1
A1D1-2	22.8			A1D1-2	29		Total	27	24.7461	12.1692	2.34197	19.9321	29.5601	7.42	49.5	Means for groups in homogeneous subsets are displayed.
A1D1-3	26			A1D1-3	30.5											a	Uses Harmonic Mean Sample Size = 3.000.
A2D1-1	36.5			A2D1-1	36		+AMF
A2D1-2	39			A2D1-2	32.8		Descriptives									VAR00002
A2D1-3	39.8			A2D1-3	37		VAR00002										VAR00001	N	Subset for alpha = .05
D2-1	14.5			D2-1	16.5			N	Mean	Std. Deviation	Std. Error	95% Confidence Interval for Mean		Minimum	Maximum				1	2	3	4	5	6
D2-2	19			D2-2	18							Lower Bound	Upper Bound			Duncan(a)	1	3	7.43
D2-3	12.8			D2-3	18.2		1	3	7.43	0.60692	0.3504	5.9224	8.9377	6.73	7.85		4	3		13.8333
A1D2-1	29.2			A1D2-1	32		2	3	28.2333	1.75024	1.0105	23.8855	32.5812	26.5	30		7	3			17.5667
A1D2-2	30			A1D2-2	27.5		3	3	33.6667	2.02073	1.16667	28.6469	38.6864	31.5	35.5		2	3				28.2333
A1D2-3	31.5			A1D2-3	36		4	3	13.8333	0.76376	0.44096	11.936	15.7306	13	14.5		5	3				28.9333
A2D2-1	40			A2D2-1	55		5	3	28.9333	1.60104	0.92436	24.9561	32.9105	27.3	30.5		8	3				31.8333	31.8333
A2D2-2	49.5			A2D2-2	56.2		6	3	35.2667	2.19393	1.26667	29.8166	40.7167	32.8	37		3	3					33.6667
A2D2-3	44			A2D2-3	59		7	3	17.5667	0.92916	0.53645	15.2585	19.8748	16.5	18.2		6	3					35.2667
							8	3	31.8333	4.25245	2.45515	21.2697	42.397	27.5	36		9	3						56.7333
							9	3	56.7333	2.05264	1.18509	51.6343	61.8324	55	59		Sig.		1	1	1	0.058	0.069	1
							Total	27	28.1663	13.9407	2.6829	22.6515	33.6811	6.73	59	Means for groups in homogeneous subsets are displayed.
																a	Uses Harmonic Mean Sample Size = 3.000.
IN	AC	DC
1	1	1	7.4484		Tests of Between-Subjects Effects
1	1	1	7.42212		Dependent Variable: VAR00004
1	1	1	7.4894		Source	Type III Sum of Squares	df	Mean Square	F	Sig.
1	2	1	20.3906		Corrected Model	8863.580(a)	17	521.387	94.967	0
1	2	1	20.6315		Intercept	37796.3	1	37796.3	6884.34	0
1	2	1	22.4453		VAR00001	157.917	1	157.917	28.763	0
1	3	1	25.8488		VAR00002	6996.35	2	3498.18	637.169	0		28.763	637.169	108.301	1.608	2.908	13.265	8.161
1	3	1	33.1227		VAR00003	1189.18	2	594.592	108.301	0
1	3	1	32.7468		VAR00001 * VAR00002	17.662	2	8.831	1.608	0.214
1	1	2	10.5		VAR00001 * VAR00003	31.932	2	15.966	2.908	0.067
1	1	2	12		VAR00002 * VAR00003	291.313	4	72.828	13.265	0
1	1	2	9		VAR00001 * VAR00002 * VAR00003	179.217	4	44.804	8.161	0
1	2	2	24.5		Error	197.647	36	5.49
1	2	2	22.8		Total	46857.5	54
1	2	2	26		Corrected Total	9061.23	53
1	3	2	36.5		a	R Squared = .978 (Adjusted R Squared = .968)
1	3	2	39
1	3	2	39.8
1	1	3	14.5
1	1	3	19
1	1	3	12.8
1	2	3	29.2
1	2	3	30
1	2	3	31.5
1	3	3	40
1	3	3	49.5
1	3	3	44
2	1	1	7.70714
2	1	1	6.73404
2	1	1	7.84897
2	2	1	26.5
2	2	1	30
2	2	1	28.2
2	3	1	31.5
2	3	1	34
2	3	1	35.5
2	1	2	13
2	1	2	14.5
2	1	2	14
2	2	2	27.3
2	2	2	29
2	2	2	30.5
2	3	2	36
2	3	2	32.8
2	3	2	37
2	1	3	16.5
2	1	3	18
2	1	3	18.2
2	2	3	32
2	2	3	27.5
2	2	3	36
2	3	3	55
2	3	3	56.2
2	3	3	59

## Sheet: mda
-AMF				+AMF				-AMF
CK1	12.8587			CK1	11.0311			Descriptives									VAR00002
CK2	12.3419			CK2	13.2136			VAR00002										VAR00001	N	Subset for alpha = .05
CK3	14.4136			CK3	12.0155				N	Mean	Std. Deviation	Std. Error	95% Confidence Interval for Mean		Minimum	Maximum				1	2	3	4
A1-1	14.1312			A1-1	14.5525								Lower Bound	Upper Bound			Duncan(a)	1	3	13.2047
A1-2	14.4266			A1-2	15.6731			1	3	13.2047	1.07833	0.62257	10.526	15.8835	12.34	14.41		7	3	13.6333
A1-3	16.7767			A1-3	13.9991			2	3	15.1115	1.44966	0.83696	11.5103	18.7127	14.13	16.78		4	3	14.3667
A2-1	17.9486			A2-1	13.6816			3	3	18.4541	0.49673	0.28679	17.2202	19.6881	17.95	18.94		2	3	15.1115
A2-2	18.4723			A2-2	16.2073			4	3	14.3667	1.0116	0.58405	11.8537	16.8796	13.2	15		3	3		18.4541
A2-3	18.9416			A2-3	17.7097			5	3	20.1	1.65227	0.95394	15.9955	24.2045	18.5	21.8		5	3		20.1
D1-1	13.2			D1-1	13.8			6	3	28.9	2.3516	1.35769	23.0583	34.7417	26.5	31.2		8	3			25.8
D1-2	14.9			D1-2	12.6			7	3	13.6333	1.61967	0.93512	9.6098	17.6568	12.6	15.5		6	3			28.9
D1-3	15			D1-3	14			8	3	25.8	1.2	0.69282	22.819	28.781	24.6	27		9	3				33.7667
A1D1-1	18.5			A1D1-1	22			9	3	33.7667	3.8553	2.22586	24.1896	43.3438	29.8	37.5		Sig.		0.268	0.297	0.058	1
A1D1-2	20			A1D1-2	20.5			Total	27	20.3708	7.34079	1.41274	17.4669	23.2747	12.34	37.5	Means for groups in homogeneous subsets are displayed.
A1D1-3	21.8			A1D1-3	22.6												a	Uses Harmonic Mean Sample Size = 3.000.
A2D1-1	26.5			A2D1-1	35.5			+AMF
A2D1-2	29			A2D1-2	31			Descriptives									VAR00002
A2D1-3	31.2			A2D1-3	36.2			VAR00002										VAR00001	N	Subset for alpha = .05
D2-1	15.5			D2-1	16.7				N	Mean	Std. Deviation	Std. Error	95% Confidence Interval for Mean		Minimum	Maximum				1	2	3	4	5	6
D2-2	12.8			D2-2	14.2								Lower Bound	Upper Bound			Duncan(a)	1	3	12.0867
D2-3	12.6			D2-3	15.3			1	3	12.0867	1.09299	0.63104	9.3716	14.8019	11.03	13.21		4	3	13.4667	13.4667
A1D2-1	24.6			A1D2-1	26.5			2	3	14.7416	0.85288	0.49241	12.6229	16.8603	14	15.67		2	3	14.7416	14.7416
A1D2-2	27			A1D2-2	29			3	3	15.8662	2.03556	1.17523	10.8096	20.9228	13.68	17.71		7	3		15.4
A1D2-3	25.8			A1D2-3	30.9			4	3	13.4667	0.75719	0.43716	11.5857	15.3476	12.6	14		3	3		15.8662
A2D2-1	34			A2D2-1	36.8			5	3	21.7	1.08167	0.6245	19.013	24.387	20.5	22.6		5	3			21.7
A2D2-2	37.5			A2D2-2	37.5			6	3	34.2333	2.82194	1.62925	27.2233	41.2434	31	36.2		8	3				28.8
A2D2-3	29.8			A2D2-3	41			7	3	15.4	1.253	0.72342	12.2874	18.5126	14.2	16.7		6	3					34.2333
								8	3	28.8	2.20681	1.2741	23.318	34.282	26.5	30.9		9	3						38.4333
								9	3	38.4333	2.25019	1.29915	32.8436	44.0231	36.8	41		Sig.		0.093	0.137	1	1	1	1
								Total	27	21.6364	9.53531	1.83507	17.8644	25.4085	11.03	41	Means for groups in homogeneous subsets are displayed.
																	a	Uses Harmonic Mean Sample Size = 3.000.
IN	AC	DC
1	1	1	12.8587		Tests of Between-Subjects Effects
1	1	1	12.3419		Dependent Variable: VAR00004
1	1	1	14.4136		Source	Type III Sum of Squares	df	Mean Square	F	Sig.
1	2	1	14.1312		Corrected Model	3668.675(a)	17	215.804	65.842	0
1	2	1	14.4266		Intercept	23822.2	1	23822.2	7268.2	0					-AMF
1	2	1	16.7767		VAR00001	21.625	1	21.625	6.598	0.015					CK1	12.8587		Descriptives
1	3	1	17.9486		VAR00002	1913.91	2	956.954	291.969	0					CK2	12.3419		VAR00002
1	3	1	18.4723		VAR00003	1135.31	2	567.657	173.194	0					CK3	14.4136			N	Mean	Std. Deviation	Std. Error	95% Confidence Interval for Mean		Minimum	Maximum
1	3	1	18.9416		VAR00001 * VAR00002	14.823	2	7.411	2.261	0.119					A1-1	14.1312							Lower Bound	Upper Bound				VAR00002
1	1	2	13.2		VAR00001 * VAR00003	49.376	2	24.688	7.532	0.002					A1-2	14.4266		1	3	13.2047	1.07833	0.62257	10.526	15.8835	12.34	14.41			VAR00001	N	Subset for alpha = .05
1	1	2	14.9		VAR00002 * VAR00003	508.757	4	127.189	38.806	0					A1-3	16.7767		2	3	15.1115	1.44966	0.83696	11.5103	18.7127	14.13	16.78					1	2	3	4	5	6
1	1	2	15		VAR00001 * VAR00002 * VAR00003	24.873	4	6.218	1.897	0.132					A2-1	17.9486		3	3	18.4541	0.49673	0.28679	17.2202	19.6881	17.95	18.94		Duncan(a)	1	3	13.2047
1	2	2	18.5		Error	117.993	36	3.278							A2-2	18.4723		4	3	14.3667	1.0116	0.58405	11.8537	16.8796	13.2	15			4	3	14.3667
1	2	2	20		Total	27608.8	54								A2-3	18.9416		5	3	21.7	1.08167	0.6245	19.013	24.387	20.5	22.6			2	3	15.1115
1	2	2	21.8		Corrected Total	3786.67	53								D1-1	13.2		6	3	34.2333	2.82194	1.62925	27.2233	41.2434	31	36.2			7	3	15.4
1	3	2	26.5		a	R Squared = .969 (Adjusted R Squared = .954)									D1-2	14.9		7	3	15.4	1.253	0.72342	12.2874	18.5126	14.2	16.7			3	3		18.4541
1	3	2	29												D1-3	15		8	3	28.8	2.20681	1.2741	23.318	34.282	26.5	30.9			5	3			21.7
1	3	2	31.2												A1D1-1	22		9	3	38.4333	2.25019	1.29915	32.8436	44.0231	36.8	41			8	3				28.8
1	1	3	15.5												A1D1-2	20.5		Total	27	22.1893	9.12545	1.75619	18.5794	25.7992	12.34	41			6	3					34.2333
1	1	3	12.8												A1D1-3	22.6													9	3						38.4333
1	1	3	12.6												A2D1-1	35.5													Sig.		0.156	1	1	1	1	1
1	2	3	24.6												A2D1-2	31												Means for groups in homogeneous subsets are displayed.
1	2	3	27												A2D1-3	36.2												a	Uses Harmonic Mean Sample Size = 3.000.
1	2	3	25.8												D2-1	16.7
1	3	3	34												D2-2	14.2
1	3	3	37.5												D2-3	15.3
1	3	3	29.8												A1D2-1	26.5
2	1	1	11.0311												A1D2-2	29
2	1	1	13.2136												A1D2-3	30.9
2	1	1	12.0155												A2D2-1	36.8
2	2	1	14.5525												A2D2-2	37.5
2	2	1	15.6731												A2D2-3	41
2	2	1	13.9991
2	3	1	13.6816												+AMF
2	3	1	16.2073												CK1	11.0311		Descriptives									VAR00002
2	3	1	17.7097												CK2	13.2136		VAR00002										VAR00001	N	Subset for alpha = .05
2	1	2	13.8												CK3	12.0155			N	Mean	Std. Deviation	Std. Error	95% Confidence Interval for Mean		Minimum	Maximum				1	2	3	4	5
2	1	2	12.6												A1-1	14.5525							Lower Bound	Upper Bound			Duncan(a)	1	3	12.0867
2	1	2	14												A1-2	15.6731		1	3	12.0867	1.09299	0.63104	9.3716	14.8019	11.03	13.21		4	3	13.4667	13.4667
2	2	2	22												A1-3	13.9991		2	3	14.7416	0.85288	0.49241	12.6229	16.8603	14	15.67		7	3	13.6333	13.6333
2	2	2	20.5												A2-1	13.6816		3	3	15.8662	2.03556	1.17523	10.8096	20.9228	13.68	17.71		2	3	14.7416	14.7416
2	2	2	22.6												A2-2	16.2073		4	3	13.4667	0.75719	0.43716	11.5857	15.3476	12.6	14		3	3		15.8662
2	3	2	35.5												A2-3	17.7097		5	3	20.1	1.65227	0.95394	15.9955	24.2045	18.5	21.8		5	3			20.1
2	3	2	31												D1-1	13.8		6	3	28.9	2.3516	1.35769	23.0583	34.7417	26.5	31.2		8	3				25.8
2	3	2	36.2												D1-2	12.6		7	3	13.6333	1.61967	0.93512	9.6098	17.6568	12.6	15.5		6	3				28.9
2	1	3	16.7												D1-3	14		8	3	25.8	1.2	0.69282	22.819	28.781	24.6	27		9	3					33.7667
2	1	3	14.2												A1D1-1	18.5		9	3	33.7667	3.8553	2.22586	24.1896	43.3438	29.8	37.5		Sig.		0.14	0.18	1	0.066	1
2	1	3	15.3												A1D1-2	20		Total	27	19.8179	7.71022	1.48383	16.7678	22.868	11.03	37.5	Means for groups in homogeneous subsets are displayed.
2	2	3	26.5												A1D1-3	21.8											a	Uses Harmonic Mean Sample Size = 3.000.
2	2	3	29												A2D1-1	26.5
2	2	3	30.9												A2D1-2	29
2	3	3	36.8												A2D1-3	31.2
2	3	3	37.5												D2-1	15.5
2	3	3	41												D2-2	12.8
															D2-3	12.6
															A1D2-1	24.6
															A1D2-2	27
															A1D2-3	25.8
															A2D2-1	34
															A2D2-2	37.5
															A2D2-3	29.8
											IN	AC	DC
											1	1	1	12.8587
											1	1	1	12.3419
											1	1	1	14.4136
											1	2	1	14.1312
											1	2	1	14.4266
											1	2	1	16.7767
											1	3	1	17.9486
											1	3	1	18.4723
											1	3	1	18.9416
											1	1	2	13.2
											1	1	2	14.9
											1	1	2	15
											1	2	2	22
											1	2	2	20.5
											1	2	2	22.6
											1	3	2	35.5
											1	3	2	31
											1	3	2	36.2
											1	1	3	16.7
											1	1	3	14.2
											1	1	3	15.3
											1	2	3	26.5
											1	2	3	29
											1	2	3	30.9
											1	3	3	36.8
											1	3	3	37.5
											1	3	3	41
											2	1	1	11.0311
											2	1	1	13.2136
											2	1	1	12.0155
											2	2	1	14.5525
											2	2	1	15.6731		Tests of Between-Subjects Effects
											2	2	1	13.9991		Dependent Variable: VAR00004
											2	3	1	13.6816		Source	Type III Sum of Squares	df	Mean Square	F	Sig.
											2	3	1	16.2073		Corrected Model	3668.675(a)	17	215.804	65.842	0
											2	3	1	17.7097		Intercept	23822.2	1	23822.2	7268.2	0
											2	1	2	13.8		VAR00001	75.917	1	75.917	23.163	0
											2	1	2	12.6		VAR00002	1913.91	2	956.954	291.969	0
											2	1	2	14		VAR00003	1135.31	2	567.657	173.194	0
											2	2	2	18.5		VAR00001 * VAR00002	22.823	2	11.411	3.482	0.041
											2	2	2	20		VAR00001 * VAR00003	7.563	2	3.782	1.154	0.327
											2	2	2	21.8		VAR00002 * VAR00003	508.757	4	127.189	38.806	0
											2	3	2	26.5		VAR00001 * VAR00002 * VAR00003	4.393	4	1.098	0.335	0.853
											2	3	2	29		Error	117.993	36	3.278
											2	3	2	31.2		Total	27608.8	54
											2	1	3	15.5		Corrected Total	3786.67	53
											2	1	3	12.8		a	R Squared = .969 (Adjusted R Squared = .954)
											2	1	3	12.6
											2	2	3	24.6
											2	2	3	27
											2	2	3	25.8
											2	3	3	34
											2	3	3	37.5
											2	3	3	29.8

## Sheet: Na
-AMF				+AMF			-AMF
CK1	47.5			CK1	52.1		Descriptives									VAR00002
CK2	56.6			CK2	50.6		VAR00002										VAR00001	N	Subset for alpha = .05
CK3	53.9			CK3	55			N	Mean	Std. Deviation	Std. Error	95% Confidence Interval for Mean		Minimum	Maximum				1	2	3	4	5
A1-1	207.9			A1-1	189.3							Lower Bound	Upper Bound			Duncan(a)	1	3	52.6667
A1-2	202.2			A1-2	179.6		1	3	52.6667	4.67369	2.69835	41.0566	64.2767	47.5	56.6		7	3	53.3667
A1-3	199.9			A1-3	170.6		2	3	203.333	4.11866	2.37791	193.102	213.565	199.9	207.9		4	3	53.5
A2-1	253.9			A2-1	207		3	3	260.533	7.64875	4.41601	241.533	279.534	253.9	268.9		2	3		203.333
A2-2	258.8			A2-2	218.5		4	3	53.5	2.36432	1.36504	47.6267	59.3733	50.8	55.2		5	3			222.1
A2-3	268.9			A2-3	209.2		5	3	222.1	7.75951	4.47996	202.824	241.376	215.2	230.5		8	3			228.967
D1-1	54.5			D1-1	56.4		6	3	269.6	3.83536	2.21435	260.072	279.128	265.5	273.1		3	3				260.533
D1-2	55.2			D1-2	58.2		7	3	53.3667	5.29182	3.05523	40.2211	66.5123	48.5	59		6	3				269.6	269.6
D1-3	50.8			D1-3	50.3		8	3	228.967	3.82797	2.21008	219.458	238.476	224.9	232.5		9	3					273.567
A1D1-1	215.2			A1D1-1	195.5		9	3	273.567	5.84494	3.37458	259.047	288.086	267	278.2		Sig.		0.858	1	0.131	0.051	0.373
A1D1-2	220.6			A1D1-2	182.5		Total	27	179.737	93.8929	18.0697	142.594	216.88	47.5	278.2	Means for groups in homogeneous subsets are displayed.
A1D1-3	230.5			A1D1-3	187.9											a	Uses Harmonic Mean Sample Size = 3.000.
A2D1-1	265.5			A2D1-1	230.5		+AMF
A2D1-2	270.2			A2D1-2	212.8		Descriptives									VAR00002
A2D1-3	273.1			A2D1-3	224		VAR00002										VAR00001	N	Subset for alpha = .05
D2-1	48.5			D2-1	46.5			N	Mean	Std. Deviation	Std. Error	95% Confidence Interval for Mean		Minimum	Maximum				1	2	3	4
D2-2	59			D2-2	52.2							Lower Bound	Upper Bound			Duncan(a)	7	3	50.7333
D2-3	52.6			D2-3	53.5		1	3	52.5667	2.23681	1.29142	47.0101	58.1232	50.6	55		1	3	52.5667
A1D2-1	232.5			A1D2-1	210.2		2	3	179.833	9.35218	5.39949	156.601	203.065	170.6	189.3		4	3	54.9667
A1D2-2	229.5			A1D2-2	218.5		3	3	211.567	6.10437	3.52436	196.403	226.731	207	218.5		2	3		179.833
A1D2-3	224.9			A1D2-3	220.6		4	3	54.9667	4.14045	2.39049	44.6812	65.2521	50.3	58.2		5	3		188.633
A2D2-1	275.5			A2D2-1	235.2		5	3	188.633	6.53095	3.77065	172.41	204.857	182.5	195.5		3	3			211.567
A2D2-2	278.2			A2D2-2	240.8		6	3	222.433	8.9534	5.16925	200.192	244.675	212.8	230.5		8	3			216.433
A2D2-3	267			A2D2-3	255.6		7	3	50.7333	3.72335	2.14968	41.484	59.9826	46.5	53.5		6	3			222.433
							8	3	216.433	5.49939	3.17508	202.772	230.095	210.2	220.6		9	3				243.867
							9	3	243.867	10.5401	6.08532	217.684	270.05	235.2	255.6		Sig.		0.485	0.134	0.082	1
							Total	27	157.893	78.0126	15.0135	127.032	188.753	46.5	255.6	Means for groups in homogeneous subsets are displayed.
																a	Uses Harmonic Mean Sample Size = 3.000.
IN	AC	DC
1	1	1	47.5
1	1	1	56.6		Tests of Between-Subjects Effects
1	1	1	53.9		Dependent Variable: VAR00004
1	2	1	207.9		Source	Type III Sum of Squares	df	Mean Square	F	Sig.
1	2	1	202.2		Corrected Model	392530.708(a)	17	23090	611.63	0		170.64	4993.62	37.536	51.534	4.387	10.91	2.32
1	2	1	199.9		Intercept	1.53892e+06	1	1.53892e+06	40764.2	0
1	3	1	253.9		VAR00001	6441.93	1	6441.93	170.64	0
1	3	1	258.8		VAR00002	377035	2	188517	4993.62	0
1	3	1	268.9		VAR00003	2834.07	2	1417.04	37.536	0
1	1	2	54.5		VAR00001 * VAR00002	3891.01	2	1945.51	51.534	0
1	1	2	55.2		VAR00001 * VAR00003	331.223	2	165.612	4.387	0.02
1	1	2	50.8		VAR00002 * VAR00003	1647.48	4	411.87	10.91	0
1	2	2	215.2		VAR00001 * VAR00002 * VAR00003	350.286	4	87.571	2.32	0.076
1	2	2	220.6		Error	1359.06	36	37.752
1	2	2	230.5		Total	1.93281e+06	54
1	3	2	265.5		Corrected Total	393890	53
1	3	2	270.2		a	R Squared = .997 (Adjusted R Squared = .995)
1	3	2	273.1
1	1	3	48.5
1	1	3	59
1	1	3	52.6
1	2	3	232.5
1	2	3	229.5
1	2	3	224.9
1	3	3	275.5
1	3	3	278.2
1	3	3	267
2	1	1	52.1
2	1	1	50.6
2	1	1	55
2	2	1	189.3
2	2	1	179.6
2	2	1	170.6
2	3	1	207
2	3	1	218.5
2	3	1	209.2
2	1	2	56.4
2	1	2	58.2
2	1	2	50.3
2	2	2	195.5
2	2	2	182.5
2	2	2	187.9
2	3	2	230.5
2	3	2	212.8
2	3	2	224
2	1	3	46.5
2	1	3	52.2
2	1	3	53.5
2	2	3	210.2
2	2	3	218.5
2	2	3	220.6
2	3	3	235.2
2	3	3	240.8
2	3	3	255.6

## Sheet: K
-AMF			+AMF
CK1	983.1		CK1	1008			Descriptives									VAR00002
CK2	1006.6		CK2	994.9			VAR00002										VAR00001	N	Subset for alpha = .05
CK3	1017.9		CK3	936.8				N	Mean	Std. Deviation	Std. Error	95% Confidence Interval for Mean		Minimum	Maximum				1	2	3	4	5
A1-1	698		A1-1	753.5								Lower Bound	Upper Bound			Duncan(a)	9	3	645.5
A1-2	677.8		A1-2	759.2			1	3	1002.53	17.7528	10.2496	958.433	1046.63	983.1	1017.9		6	3	651.333	651.333
A1-3	713		A1-3	746.9			2	3	696.267	17.6639	10.1983	652.387	740.146	677.8	713		8	3	662.967	662.967	662.967
A2-1	666		A2-1	700.5			3	3	666.667	5.23195	3.02067	653.67	679.664	661.8	672.2		3	3		666.667	666.667
A2-2	661.8		A2-2	727.2			4	3	998.1	7.36274	4.25088	979.81	1016.39	990.5	1005.2		5	3			672.733
A2-3	672.2		A2-3	718.7			5	3	672.733	10.7221	6.1904	646.098	699.369	660.5	680.5		2	3				696.267
D1-1	1005.2		D1-1	1100.5			6	3	651.333	9.69656	5.59831	627.246	675.421	640.3	658.5		7	3					983.167
D1-2	998.6		D1-2	996.5			7	3	983.167	8.8444	5.10631	961.196	1005.14	976.5	993.2		4	3					998.1
D1-3	990.5		D1-3	987			8	3	662.967	7.0529	4.07199	645.446	680.487	655.8	669.9		1	3					1002.53
A1D1-1	680.5		A1D1-1	744.3			9	3	645.5	7.99937	4.61844	625.629	665.371	636.5	651.8		Sig.		0.083	0.126	0.322	1	0.057
A1D1-2	677.2		A1D1-2	731.2			Total	27	775.474	158.827	30.5662	712.644	838.304	636.5	1017.9	Means for groups in homogeneous subsets are displayed.
A1D1-3	660.5		A1D1-3	745.8												a	Uses Harmonic Mean Sample Size = 3.000.
A2D1-1	658.5		A2D1-1	677.5
A2D1-2	655.2		A2D1-2	680.2			Descriptives									VAR00002
A2D1-3	640.3		A2D1-3	664.3			VAR00002										VAR00001	N	Subset for alpha = .05
D2-1	993.2		D2-1	988.2				N	Mean	Std. Deviation	Std. Error	95% Confidence Interval for Mean		Minimum	Maximum				1	2	3	4	5
D2-2	976.5		D2-2	979.5								Lower Bound	Upper Bound			Duncan(a)	9	3	657.167
D2-3	979.8		D2-3	970.6			1	3	979.9	37.896	21.8793	885.761	1074.04	936.8	1008		6	3	674	674
A1D2-1	663.2		A1D2-1	735.5			2	3	753.2	6.15549	3.55387	737.909	768.491	746.9	759.2		3	3		715.467	715.467
A1D2-2	655.8		A1D2-2	749.2			3	3	715.467	13.6405	7.87535	681.582	749.352	700.5	727.2		5	3			740.433
A1D2-3	669.9		A1D2-3	745.3			4	3	1028	62.9663	36.3536	871.583	1184.42	987	1100.5		8	3			743.333
A2D2-1	651.8		A2D2-1	662.5			5	3	740.433	8.0314	4.63693	720.482	760.384	731.2	745.8		2	3			753.2
A2D2-2	636.5		A2D2-2	651			6	3	674	8.50823	4.91223	652.864	695.136	664.3	680.2		7	3				979.433
A2D2-3	648.2		A2D2-3	658			7	3	979.433	8.80019	5.08079	957.572	1001.29	970.6	988.2		1	3				979.9
							8	3	743.333	7.05856	4.07526	725.799	760.868	735.5	749.2		4	3					1028
							9		657.167	5.79511	3.34581	642.771	671.562	651	662.5		Sig.		0.432	0.063	0.114	0.982	1
							Total	27	807.881	141.002	27.1358	752.103	863.66	651	1100.5	Means for groups in homogeneous subsets are displayed.
																a	Uses Harmonic Mean Sample Size = 3.000.
IN	AC	DC
1	1	1	983.1		Tests of Between-Subjects Effects
1	1	1	1006.6		Dependent Variable: VAR00004
1	1	1	1017.9		Source	Type III Sum of Squares	df	Mean Square	F	Sig.
1	2	1	698		Corrected Model	1172907.553(a)	17	68994.6	176.601	0
1	2	1	677.8		Intercept	3.38447e+07	1	3.38447e+07	86630	0
1	2	1	713		VAR00001	14178.2	1	14178.2	36.291	0		36.291	1452.59	6.697	13.177	0.518	2.928	2.063
1	3	1	666		VAR00002	1.135e+06	2	567499	1452.59	0
1	3	1	661.8		VAR00003	5232.6	2	2616.3	6.697	0.003
1	3	1	672.2		VAR00001 * VAR00002	10296.1	2	5148.04	13.177	0
1	1	2	1005.2		VAR00001 * VAR00003	405.045	2	202.522	0.518	0.6
1	1	2	998.6		VAR00002 * VAR00003	4575.18	4	1143.8	2.928	0.034
1	1	2	990.5		VAR00001 * VAR00002 * VAR00003	3223.2	4	805.799	2.063	0.106
1	2	2	680.5		Error	14064.5	36	390.681
1	2	2	677.2		Total	3.50317e+07	54
1	2	2	660.5		Corrected Total	1.18697e+06	53
1	3	2	658.5		a	R Squared = .988 (Adjusted R Squared = .983)
1	3	2	655.2
1	3	2	640.3
1	1	3	993.2
1	1	3	976.5
1	1	3	979.8
1	2	3	663.2
1	2	3	655.8
1	2	3	669.9
1	3	3	651.8
1	3	3	636.5
1	3	3	648.2
2	1	1	1008
2	1	1	994.9
2	1	1	936.8
2	2	1	753.5
2	2	1	759.2
2	2	1	746.9
2	3	1	700.5
2	3	1	727.2
2	3	1	718.7
2	1	2	1100.5
2	1	2	996.5
2	1	2	987
2	2	2	744.3
2	2	2	731.2
2	2	2	745.8
2	3	2	677.5
2	3	2	680.2
2	3	2	664.3
2	1	3	988.2
2	1	3	979.5
2	1	3	970.6
2	2	3	735.5
2	2	3	749.2
2	2	3	745.3
2	3	3	662.5
2	3	3	651
2	3	3	658

## Sheet: Na to K
-AMF	Na	K			+AMF	Na	K			-AMF
CK1	47.5	983.1	0.0483165		CK1	52.1	1008	0.0516865		Descriptives									VAR00002
CK2	56.6	1006.6	0.0562289		CK2	50.6	994.9	0.0508594		VAR00002										VAR00001	N	Subset for alpha = .05
CK3	53.9	1017.9	0.0529522		CK3	55	936.8	0.0587105			N	Mean	Std. Deviation	Std. Error	95% Confidence Interval for Mean		Minimum	Maximum				1	2	3	4	5
A1-1	207.9	698	0.297851		A1-1	189.3	753.5	0.251228							Lower Bound	Upper Bound			Duncan(a)	1	3	0.0525
A1-2	202.2	677.8	0.298318		A1-2	179.6	759.2	0.236565		1	3	0.0525	0.00398	0.0023	0.0426	0.0624	0.05	0.06		4	3	0.0536
A1-3	199.9	713	0.280365		A1-3	170.6	746.9	0.228411		2	3	0.2922	0.01023	0.00591	0.2668	0.3176	0.28	0.3		7	3	0.0543
A2-1	253.9	666	0.381231		A2-1	207	700.5	0.295503		3	3	0.3908	0.0094	0.00543	0.3674	0.4141	0.38	0.4		2	3		0.2922
A2-2	258.8	661.8	0.391055		A2-2	218.5	727.2	0.300468		4	3	0.0536	0.00207	0.00119	0.0485	0.0587	0.05	0.06		5	3			0.3303
A2-3	268.9	672.2	0.40003		A2-3	209.2	718.7	0.291081		5	3	0.3303	0.01684	0.00972	0.2885	0.3722	0.32	0.35		8	3			0.3454
D1-1	54.5	1005.2	0.0542181		D1-1	56.4	1100.5	0.0512494		6	3	0.414	0.01175	0.00678	0.3848	0.4432	0.4	0.43		3	3				0.3908
D1-2	55.2	998.6	0.0552774		D1-2	58.2	996.5	0.0584044		7	3	0.0543	0.00582	0.00336	0.0399	0.0688	0.05	0.06		6	3					0.414
D1-3	50.8	990.5	0.0512872		D1-3	50.3	987	0.0509625		8	3	0.3454	0.0084	0.00485	0.3245	0.3663	0.34	0.35		9	3					0.4239
A1D1-1	215.2	680.5	0.316238		A1D1-1	195.5	744.3	0.262663		9	3	0.4239	0.01263	0.00729	0.3925	0.4553	0.41	0.44		Sig.		0.836	1	0.081	1	0.243
A1D1-2	220.6	677.2	0.325753		A1D1-2	182.5	731.2	0.24959		Total	27	0.2619	0.15548	0.02992	0.2004	0.3234	0.05	0.44	Means for groups in homogeneous subsets are displayed.
A1D1-3	230.5	660.5	0.348978		A1D1-3	187.9	745.8	0.251944											a	Uses Harmonic Mean Sample Size = 3.000.
A2D1-1	265.5	658.5	0.403189		A2D1-1	230.5	677.5	0.340221		+AMF
A2D1-2	270.2	655.2	0.412393		A2D1-2	212.8	680.2	0.312849		Descriptives									VAR00002
A2D1-3	273.1	640.3	0.426519		A2D1-3	224	664.3	0.337197		VAR00002										VAR00001	N	Subset for alpha = .05
D2-1	48.5	993.2	0.0488321		D2-1	46.5	988.2	0.0470553			N	Mean	Std. Deviation	Std. Error	95% Confidence Interval for Mean		Minimum	Maximum				1	2	3	4	5
D2-2	59	976.5	0.0604199		D2-2	52.2	979.5	0.0532925							Lower Bound	Upper Bound			Duncan(a)	7	3	0.0518
D2-3	52.6	979.8	0.0536844		D2-3	53.5	970.6	0.0551205		1	3	0.0538	0.00431	0.00249	0.043	0.0645	0.05	0.06		4	3	0.0535
A1D2-1	232.5	663.2	0.350573		A1D2-1	210.2	735.5	0.285792		2	3	0.2387	0.01156	0.00668	0.21	0.2675	0.23	0.25		1	3	0.0538
A1D2-2	229.5	655.8	0.349954		A1D2-2	218.5	749.2	0.291644		3	3	0.2957	0.0047	0.00271	0.284	0.3073	0.29	0.3		2	3		0.2387
A1D2-3	224.9	669.9	0.335722		A1D2-3	220.6	745.3	0.295988		4	3	0.0535	0.00422	0.00243	0.0431	0.064	0.05	0.06		5	3		0.2547
A2D2-1	275.5	651.8	0.422676		A2D2-1	235.2	662.5	0.355019		5	3	0.2547	0.00697	0.00402	0.2374	0.272	0.25	0.26		8	3			0.2911
A2D2-2	278.2	636.5	0.437078		A2D2-2	240.8	651	0.369892		6	3	0.3301	0.01501	0.00866	0.2928	0.3674	0.31	0.34		3	3			0.2957
A2D2-3	267	648.2	0.41191		A2D2-3	255.6	658	0.38845		7	3	0.0518	0.00423	0.00244	0.0413	0.0623	0.05	0.06		6	3				0.3301
										8	3	0.2911	0.00512	0.00295	0.2784	0.3039	0.29	0.3		9	3					0.3711
										9	3	0.3711	0.01675	0.00967	0.3295	0.4127	0.36	0.39		Sig.		0.815	0.051	0.56	1	1
										Total	27	0.2156	0.12308	0.02369	0.1669	0.2643	0.05	0.39	Means for groups in homogeneous subsets are displayed.
																			a	Uses Harmonic Mean Sample Size = 3.000.
IN	AC	DC
1	1	1	0.0483165			Tests of Between-Subjects Effects
1	1	1	0.0562289			Dependent Variable: VAR00004
1	1	1	0.0529522			Source	Type III Sum of Squares	df	Mean Square	F	Sig.
1	2	1	0.297851			Corrected Model	1.048(a)	17	0.062	656.788	0
1	2	1	0.298318			Intercept	3.078	1	3.078	32799.6	0
1	2	1	0.280365			VAR00001	0.029	1	0.029	307.917	0
1	3	1	0.381231			VAR00002	0.985	2	0.493	5248.03	0
1	3	1	0.391055			VAR00003	0.011	2	0.006	61.099	0
1	3	1	0.40003			VAR00001 * VAR00002	0.015	2	0.007	78.685	0
1	1	2	0.0542181			VAR00001 * VAR00003	0.001	2	0	3.625	0.037
1	1	2	0.0552774			VAR00002 * VAR00003	0.006	4	0.001	15.328	0
1	1	2	0.0512872			VAR00001 * VAR00002 * VAR00003	0.001	4	0	3.321	0.021
1	2	2	0.316238			Error	0.003	36	9.39e-05
1	2	2	0.325753			Total	4.13	54
1	2	2	0.348978			Corrected Total	1.051	53
1	3	2	0.403189			a	R Squared = .997 (Adjusted R Squared = .995)
1	3	2	0.412393
1	3	2	0.426519
1	1	3	0.0488321
1	1	3	0.0604199
1	1	3	0.0536844
1	2	3	0.350573
1	2	3	0.349954
1	2	3	0.335722
1	3	3	0.422676
1	3	3	0.437078
1	3	3	0.41191
2	1	1	0.0516865
2	1	1	0.0508594
2	1	1	0.0587105
2	2	1	0.251228
2	2	1	0.236565
2	2	1	0.228411
2	3	1	0.295503
2	3	1	0.300468
2	3	1	0.291081
2	1	2	0.0512494
2	1	2	0.0584044
2	1	2	0.0509625
2	2	2	0.262663
2	2	2	0.24959
2	2	2	0.251944
2	3	2	0.340221
2	3	2	0.312849
2	3	2	0.337197
2	1	3	0.0470553
2	1	3	0.0532925
2	1	3	0.0551205
2	2	3	0.285792
2	2	3	0.291644
2	2	3	0.295988
2	3	3	0.355019
2	3	3	0.369892
2	3	3	0.38845
